# Supplementary material
Source: Springer Nature journal article supplement (https://www.springermedizin.de/resource/supplementary/12871_2013_211_MOESM2_ESM.pdf/9429142)

# NSAID used in a pre-defined dosage as a minimum

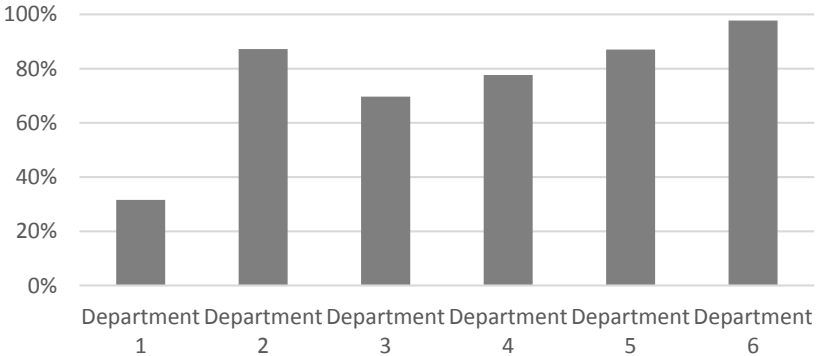

Supplement: MOESM2 [file 9429142]
